# Supplementary material
Source: publisher site journal article supplement (https://www.dovepress.com/get_supplementary_file.php?f=396914.docx)
Supplement: Supplementary file 1 [file get_supplementary_file.php]

| 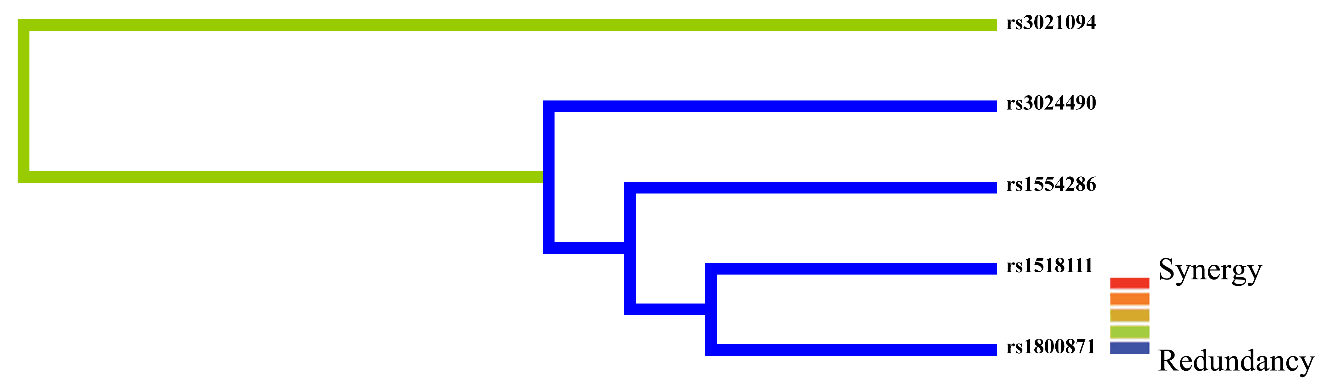**A** |
| --- |
| **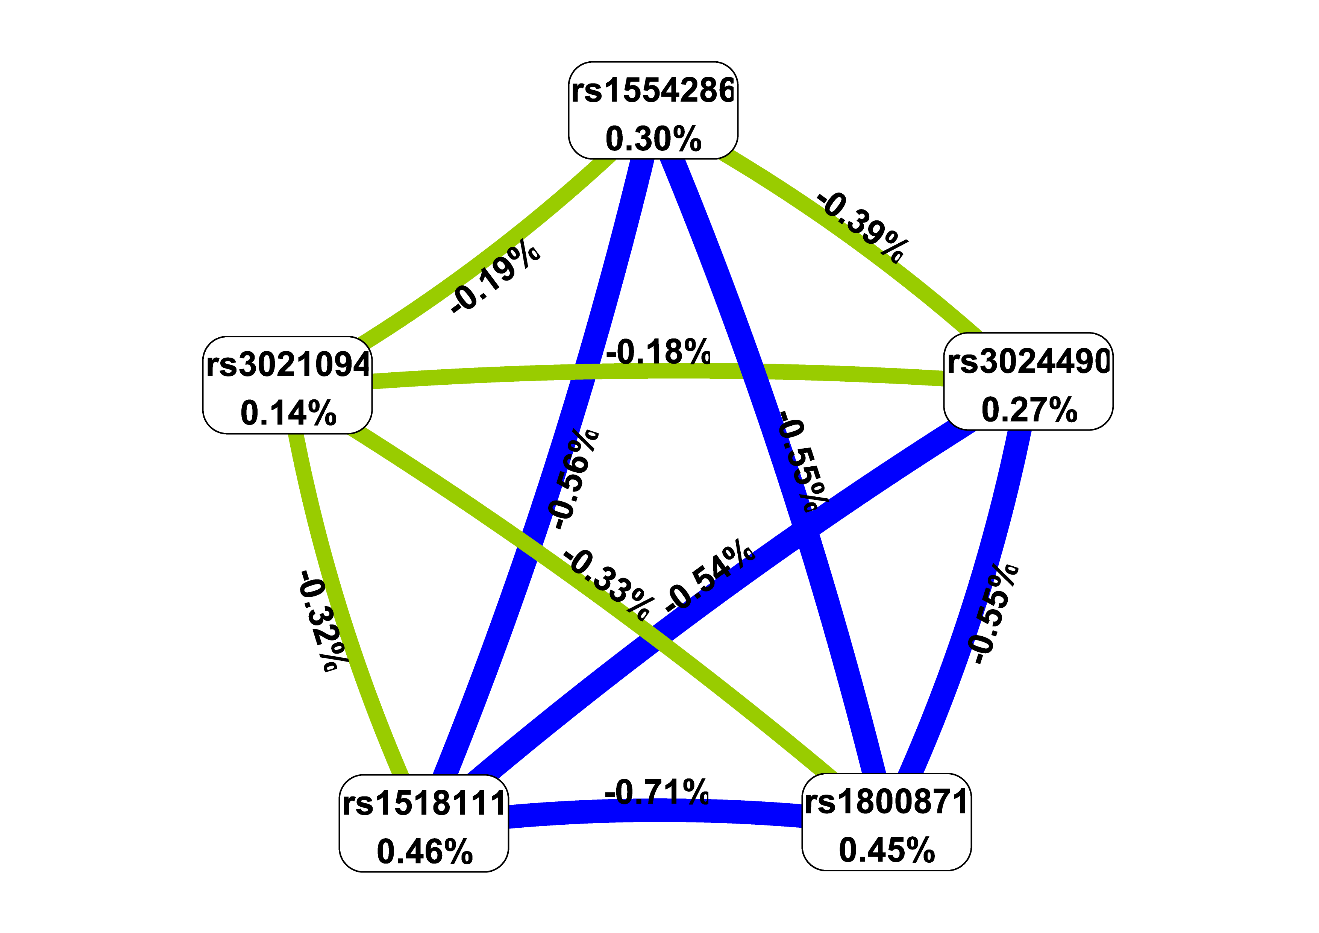B** |

**Supplemental Figure 1** Multifactor dimensionality reduction (MDR) analysis of interaction between the five genetic loci of *IL-10* (rs1554286, rs1518111, rs3021094, rs3024490, rs1800871). (A) SNP-SNP Interaction Dendrogram: the color represents the degree of redundancy or synergy between SNP-SNP; the closer the color is to red, the more synergy, and the closer to blue, the more redundancy. (B) Fruchterman-Reingold: values in nodes represent the IGs of individual attribute (main effects). Values between nodes are IGs of each pair of attributes (interaction effects).

**Supplemental table 1** The primers for *IL-10* gene amplification and sequencing.

| **Gene** | **SNP** | **1st-PCR primer** | **2nd-PCR primer** | **UEP-DIR** | **UEP-SEQ** |
| --- | --- | --- | --- | --- | --- |
| *IL-10* | rs1554286 | ACGTTGGATGTACGGCGCTGTGTAAGTAG | ACGTTGGATGTGTCTGTGGATGTGAGTGTC | F | CAGCTGCAAGGGAAA |
|  | rs1518111 | ACGTTGGATGGTGTGCAGCATGATTAAGGG | ACGTTGGATGCAAAGCGAAGGAAACAAACC | F | aCTGCAATCAGGAAGCAGAG |
|  | rs3021094 | ACGTTGGATGGGATTCAACAGTGATGGGAC | ACGTTGGATGTTCCCTTCAAAATCGGCCAG | R | cgTTAAATAACTTGACTCTGAGG |
|  | rs3024490 | ACGTTGGATGATTTCCCTGCTGCAAGGCAT | ACGTTGGATGGGCGCTCTATACTTTATTGG | R | atgGGCTAGGAGAAGTAAAGAAA |
|  | rs1800871 | ACGTTGGATGATGCTAGTCAGGTAGTGCTC | ACGTTGGATGGGTGTACCCTTGTACAGGTG | R | CCCTTGTACAGGTGATGTAA |

SNP, single nucleotide polymorphism; UEP-DIR, Unique extension primer-direction; UEP-SEQ, Unique extension primer-sequencing.

**Supplemental table 2** Genetic variants in *IL-10* associated with susceptibility to OP in the stratified analysis (age and gender)

| **SNP ID** | **Model** | **Genotype** | **≤ 60 years old** | | **> 60 years old** | |  | | **Female** | | **Male** | |
| --- | --- | --- | --- | --- | --- | --- | --- | --- | --- | --- | --- | --- |
| **OR (95% CI)** | ***p*-value** | **OR (95% CI)** | ***p*-value** |  | **OR (95% CI)** | | ***p*-value** | **OR (95% CI)** | ***p*-value** |
| rs1554286 | Allele | A | 1 |  | 1 |  |  | 1 | |  | 1 |  |
|  |  | G | 1.25 (1.02-1.53) | **0.033** | 1.16 (0.93-1.46) | 0.187 |  | 1.33 (1.08-1.65) | | **0.008** | 1.1 (0.89-1.37) | 0.379 |
|  | Codominant | AA | 1 |  | 1 |  |  | 1 | |  | 1 |  |
|  |  | AG | 1.11 (0.82-1.5) | 0.489 | 1.25 (0.9-1.74) | 0.175 |  | 1.25 (0.93-1.69) | | 0.140 | 1.11 (0.8-1.54) | 0.525 |
|  |  | GG | 1.89 (1.17-3.06) | **0.010** | 1.31 (0.79-2.16) | 0.297 |  | 2.09 (1.25-3.49) | | **0.005** | 1.27 (0.79-2.04) | 0.333 |
|  | Dominant | AA | 1 | 0.150 | 1 | 0.140 |  | 1 | | **0.030** | 1 | 0.390 |
|  |  | AG-GG | 1.23 (0.93-1.63) |  | 1.26 (0.93-1.72) |  |  | 1.37 (1.03-1.83) | |  | 1.14 (0.84-1.56) |  |
|  | Recessive | AA-AG | 1 | **0.011** | 1 | 0.520 |  | 1 | | **0.011** | 1 | 0.430 |
|  |  | GG | 1.79 (1.13-2.81) |  | 1.17 (0.73-1.88) |  |  | 1.86 (1.14-3.04) | |  | 1.20 (0.77-1.87) |  |
|  | Overdominant | AA-GG | 1 | 0.830 | 1 | 0.280 |  | 1 | | 0.520 | 1 | 0.760 |
|  |  | AG | 0.97 (0.73-1.28) |  | 1.19 (0.87-1.61) |  |  | 1.10 (0.83-1.46) | |  | 1.05 (0.77-1.42) |  |
|  | Log-additive | - | 1.28 (1.03-1.58) | **0.023** | 1.18 (0.94-1.48) | 0.160 |  | 1.37 (1.10-1.70) | | **0.005** | 1.12 (0.90-1.40) | 0.310 |
| rs1518111 | Allele | T | 1 |  |  |  |  | 1 | |  | 1 |  |
|  |  | C | 1.26 (1.03-1.55) | **0.024** | 1.16 (0.93-1.46) | 0.191 |  | 1.30 (1.05-1.61) | | **0.014** | 1.14 (0.92-1.42) | 0.230 |
|  | Codominant | TT | 1 |  | 1 |  |  | 1 | |  | 1 |  |
|  |  | CT | 1.13 (0.84-1.52) | 0.430 | 1.21 (0.87-1.67) | 0.263 |  | 1.23 (0.92-1.66) | | 0.167 | 1.09 (0.79-1.51) | 0.593 |
|  |  | CC | 1.97 (1.21-3.22) | **0.007** | 1.34 (0.81-2.2) | 0.251 |  | 2.00 (1.19-3.38) | | **0.009** | 1.38 (0.86-2.22) | 0.184 |
|  | Dominant | TT | 1 | 0.130 | 1 | 0.180 |  | 1 | | **0.045** | 1 | 0.360 |
|  |  | CT-CC | 1.25 (0.94-1.66) |  | 1.23 (0.91-1.68) |  |  | 1.34 (1.01-1.78) | |  | 1.15 (0.85-1.57) |  |
|  | Recessive | TT-CT | 1 | **0.008** | 1 | 0.400 |  | 1 | | **0.019** | 1 | 0.220 |
|  |  | CC | 1.85 (1.16-2.94) |  | 1.22 (0.76-1.96) |  |  | 1.80 (1.09-2.98) | |  | 1.32 (0.85-2.05) |  |
|  | Overdominant | TT-CC | 1 | 0.890 | 1 | 0.430 |  | 1 | | 0.530 | 1 | 0.950 |
|  |  | CT | 0.98 (0.74-1.30) |  | 1.13 (0.83-1.54) |  |  | 1.10 (0.82-1.46) | |  | 1.01 (0.75-1.37) |  |
|  | Log-additive | - | 1.30 (1.05-1.61) | **0.017** | 1.17 (0.94-1.47) | 0.170 |  | 1.34 (1.07-1.67) | | **0.009** | 1.15 (0.92-1.44) | 0.210 |
| rs3021094 | Allele | T | 1 |  | 1 |  |  | 1 | |  | 1 |  |
|  |  | G | 0.93 (0.76-1.13) | 0.460 | 0.94 (0.76-1.16) | 0.560 |  | 0.87 (0.71-1.06) | | 0.167 | 1.01 (0.82-1.25) | 0.933 |
|  | Codominant | TT | 1 |  | 1 |  |  | 1 | |  | 1 |  |
|  |  | GT | 0.88 (0.64-1.21) | 0.431 | 1.03 (0.73-1.46) | 0.855 |  | 0.74 (0.53-1.04) | | 0.079 | 1.13 (0.8-1.58) | 0.495 |
|  |  | GG | 0.85 (0.56-1.27) | 0.420 | 0.9 (0.58-1.39) | 0.638 |  | 0.78 (0.52-1.17) | | 0.230 | 0.88 (0.57-1.37) | 0.574 |
|  | Dominant | TT | 1 | 0.370 | 1 | 0.960 |  | 1 | | 0.074 | 1 | 0.750 |
|  |  | GT-GG | 0.87 (0.64-1.18) |  | 0.99 (0.72-1.37) |  |  | 0.75 (0.55-1.03) | |  | 1.05 (0.76-1.45) |  |
|  | Recessive | TT-GT | 1 | 0.630 | 1 | 0.530 |  | 1 | | 0.710 | 1 | 0.330 |
|  |  | GG | 0.92 (0.64-1.31) |  | 0.88 (0.60-1.30) |  |  | 0.94 (0.66-1.33) | |  | 0.82 (0.55-1.22) |  |
|  | Overdominant | TT-GG | 1 | 0.650 | 1 | 0.650 |  | 1 | | 0.180 | 1 | 0.290 |
|  |  | GT | 0.94 (0.71-1.24) |  | 1.07 (0.79-1.46) |  |  | 0.82 (0.62-1.09) | |  | 1.18 (0.87-1.59) |  |
|  | Log-additive | - | 0.91 (0.75-1.12) | 0.390 | 0.96 (0.77-1.19) | 0.710 |  | 0.87 (0.71-1.06) | | 0.170 | 0.96 (0.78-1.20) | 0.740 |
| rs3024490 | Allele | A | 1 |  | 1 |  |  | 1 | |  | 1 |  |
|  |  | C | 1.25 (1.02-1.54) | **0.030** | 1.14 (0.91-1.43) | 0.268 |  | 1.31 (1.06-1.62) | | **0.013** | 1.1 (0.89-1.37) | 0.373 |
|  | Codominant | AA | 1 |  | 1 |  |  | 1 | |  | 1 |  |
|  |  | CA | 1.12 (0.83-1.51) | 0.441 | 1.21 (0.88-1.68) | 0.241 |  | 1.23 (0.92-1.66) | | 0.166 | 1.1 (0.8-1.52) | 0.564 |
|  |  | CC | 1.92 (1.17-3.15) | **0.009** | 1.26 (0.76-2.1) | 0.369 |  | 2.13 (1.24-3.65) | | **0.006** | 1.26 (0.78-2.03) | 0.344 |
|  | Dominant | AA | 1 | 0.140 | 1 | 0.200 |  | 1 | | **0.041** | 1 | 0.420 |
|  |  | CA-CC | 1.24 (0.93-1.65) |  | 1.22 (0.90-1.66) |  |  | 1.35 (1.01-1.79) | |  | 1.13 (0.84-1.54) |  |
|  | Recessive | AA-CA | 1 | **0.012** | 1 | 0.570 |  | 1 | | **0.012** | 1 | 0.430 |
|  |  | CC | 1.81 (1.13-2.88) |  | 1.15 (0.71-1.86) |  |  | 1.91 (1.14-3.21) | |  | 1.20 (0.77-1.87) |  |
|  | Overdominant | AA-CC | 1 | 0.910 | 1 | 0.350 |  | 1 | | 0.550 | 1 | 0.800 |
|  |  | CA | 0.98 (0.74-1.30) |  | 1.16 (0.85-1.58) |  |  | 1.09 (0.82-1.45) | |  | 1.04 (0.77-1.41) |  |
|  | Log-additive | - | 1.29 (1.04-1.60) | **0.021** | 1.15 (0.92-1.45) | 0.220 |  | 1.36 (1.09-1.70) | | **0.007** | 1.12 (0.89-1.39) | 0.330 |
| rs1800871 | Allele | A | 1 |  | 1 |  |  | 1 | |  | 1 |  |
|  |  | G | 1.27 (1.04-1.56) | **0.022** | 1.13 (0.9-1.42) | 0.280 |  | 1.31 (1.06-1.62) | | **0.013** | 1.12 (0.9-1.39) | 0.310 |
|  | Codominant | AA | 1 |  | 1 |  |  | 1 | |  | 1 |  |
|  |  | GA | 1.13 (0.84-1.53) | 0.413 | 1.18 (0.86-1.64) | 0.309 |  | 1.23 (0.91-1.66) | | 0.170 | 1.07 (0.77-1.48) | 0.678 |
|  |  | GG | 1.99 (1.22-3.26) | **0.006** | 1.29 (0.78-2.14) | 0.324 |  | 2.13 (1.24-3.64) | | **0.006** | 1.31 (0.81-2.11) | 0.265 |
|  | Dominant | AA | 1 | 0.120 | 1 | 0.230 |  | 1 | | **0.042** | 1 | 0.460 |
|  |  | GA-GG | 1.26 (0.94-1.67) |  | 1.21 (0.89-1.64) |  |  | 1.34 (1.01-1.79) | |  | 1.12 (0.83-1.53) |  |
|  | Recessive | AA-GA | 1 | **0.008** | 1 | 0.480 |  | 1 | | **0.012** | 1 | 0.300 |
|  |  | GG | 1.87 (1.17-2.97) |  | 1.19 (0.73-1.92) |  |  | 1.91 (1.14-3.21) | |  | 1.26 (0.81-1.97) |  |
|  | Overdominant | AA-GG | 1 | 0.900 | 1 | 0.460 |  | 1 | | 0.550 | 1 | 0.990 |
|  |  | GA | 0.98 (0.74-1.30) |  | 1.12 (0.83-1.53) |  |  | 1.09 (0.82-1.45) | |  | 1.00 (0.74-1.36) |  |
|  | Log-additive | - | 1.31 (1.05-1.62) | **0.015** | 1.15 (0.92-1.45) | 0.220 |  | 1.36 (1.09-1.70) | | **0.007** | 1.12 (0.90-1.40) | 0.300 |

OP: osteoporosis; SNP, Single nucleotide polymorphisms; OR, Odds ratio; CI, Confidence interval.

“-” indicates Log-additive model.

‘*p*-value< 0.05’ and bold text represent statistical significance.

**Supplemental table 3** Genetic variants in*IL-10* associated with susceptibility to OP in the stratified analysis (drinking and smoking)

| **SNP ID** | **Model** | **Genotype** | **Non-smoking** | | **Smoking** | |  | **Non-drinking** | | **Drinking** | |
| --- | --- | --- | --- | --- | --- | --- | --- | --- | --- | --- | --- |
| **OR (95% CI)** | ***p*-value** | **OR (95% CI)** | ***p*-value** |  | **OR (95% CI)** | ***p*-value** | **OR (95% CI)** | ***p*-value** |
| rs1554286 | Allele | A | 1 |  | 1 |  |  | 1 |  | 1 |  |
|  |  | G | 1.17 (0.94-1.46) | 0.166 | 1.25 (1.01-1.53) | **0.037** |  | 1.16 (0.92-1.46) | 0.214 | 1.25 (1.03-1.53) | **0.026** |
|  | Codominant | AA | 1 |  | 1 |  |  | 1 |  | 1 |  |
|  |  | AG | 1.17 (0.85-1.62) | 0.341 | 1.2 (0.89-1.62) | 0.228 |  | 1.36 (0.97-1.92) | 0.076 | 1.07 (0.80-1.43) | 0.641 |
|  |  | GG | 1.59 (0.95-2.66) | 0.075 | 1.61 (1.01-2.58) | **0.048** |  | 1.28 (0.74-2.23) | 0.377 | 1.79 (1.13-2.82) | **0.012** |
|  | Dominant | AA | 1 | 0.160 | 1 | 0.095 |  | 1 | 0.074 | 1 | 0.210 |
|  |  | AG-GG | 1.24 (0.91-1.70) |  | 1.27 (0.96-1.69) |  |  | 1.35 (0.97-1.87) |  | 1.19 (0.91-1.57) |  |
|  | Recessive | AA-AG | 1 | 0.120 | 1 | 0.091 |  | 1 | 0.760 | 1 | **0.012** |
|  |  | GG | 1.47 (0.90-2.39) |  | 1.46 (0.94-2.28) |  |  | 1.09 (0.64-1.83) |  | 1.73 (1.12-2.66) |  |
|  | Overdominant | AA-GG | 1 | 0.700 | 1 | 0.570 |  | 1 | 0.120 | 1 | 0.700 |
|  |  | AG | 1.06 (0.78-1.44) |  | 1.08 (0.82-1.44) |  |  | 1.29 (0.94-1.79) |  | 0.95 (0.72-1.24) |  |
|  | Log-additive | - | 1.23 (0.98-1.55) | 0.075 | 1.25 (1.01-1.54) | **0.041** |  | 1.21 (0.94-1.55) | 0.130 | 1.24 (1.02-1.52) | **0.033** |
| rs1518111 | Allele | T | 1 |  | 1 |  |  | 1 |  | 1 |  |
|  |  | C | 1.17 (0.94-1.47) | 0.162 | 1.26 (1.02-1.54) | **0.030** |  | 1.17 (0.93-1.47) | 0.192 | 1.26 (1.03-1.54) | **0.023** |
|  | Codominant | TT | 1 |  | 1 |  |  | 1 |  | 1 |  |
|  |  | CT | 1.17 (0.84-1.61) | 0.357 | 1.18 (0.87-1.59) | 0.281 |  | 1.34 (0.95-1.89) | 0.091 | 1.06 (0.79-1.41) | 0.707 |
|  |  | CC | 1.64 (0.98-2.75) | 0.062 | 1.67 (1.04-2.68) | **0.033** |  | 1.32 (0.76-2.28) | 0.326 | 1.86 (1.17-2.96) | **0.008** |
|  | Dominant | TT | 1 | 0.160 | 1 | 0.110 |  | 1 | 0.081 | 1 | 0.220 |
|  |  | CT-CC | 1.25 (0.92-1.69) |  | 1.26 (0.95-1.68) |  |  | 1.34 (0.96-1.85) |  | 1.19 (0.90-1.56) |  |
|  | Recessive | TT-CT | 1 | 0.095 | 1 | 0.058 |  | 1 | 0.650 | 1 | **0.007** |
|  |  | CC | 1.52 (0.93-2.48) |  | 1.53 (0.98-2.40) |  |  | 1.13 (0.67-1.89) |  | 1.81 (1.17-2.81) |  |
|  | Overdominant | TT-CC | 1 | 0.730 | 1 | 0.700 |  | 1 | 0.150 | 1 | 0.600 |
|  |  | CT | 1.05 (0.78-1.43) |  | 1.06 (0.80-1.40) |  |  | 1.27 (0.92-1.75) |  | 0.93 (0.71-1.22) |  |
|  | Log-additive | - | 1.24 (0.98-1.56) | 0.067 | 1.25 (1.01-1.55) | **0.035** |  | 1.21 (0.95-1.55) | 0.130 | 1.25 (1.02-1.54) | **0.029** |
| rs3021094 | Allele | T | 1 |  | 1 |  |  | 1 |  | 1 |  |
|  |  | G | 1.03 (0.83-1.27) | 0.794 | 0.86 (0.7-1.04) | 0.126 |  | 0.89 (0.71-1.11) | 0.286 | 0.97 (0.8-1.17) | 0.725 |
|  | Codominant | TT | 1 |  | 1 |  |  | 1 |  | 1 |  |
|  |  | GT | 0.94 (0.66-1.33) | 0.720 | 0.86 (0.62-1.19) | 0.355 |  | 0.88 (0.61-1.26) | 0.480 | 0.94 (0.69-1.29) | 0.711 |
|  |  | GG | 0.99 (0.64-1.55) | 0.977 | 0.72 (0.48-1.08) | 0.110 |  | 0.72 (0.44-1.17) | 0.186 | 0.94 (0.64-1.39) | 0.771 |
|  | Dominant | TT | 1 | 0.780 | 1 | 0.190 |  | 1 | 0.310 | 1 | 0.700 |
|  |  | GT-GG | 0.95 (0.69-1.32) |  | 0.82 (0.60-1.11) |  |  | 0.83 (0.59-1.18) |  | 0.94 (0.70-1.26) |  |
|  | Recessive | TT-GT | 1 | 0.870 | 1 | 0.190 |  | 1 | 0.260 | 1 | 0.900 |
|  |  | GG | 1.03 (0.70-1.53) |  | 0.79 (0.55-1.12) |  |  | 0.78 (0.51-1.20) |  | 0.98 (0.70-1.37) |  |
|  | Overdominant | TT-GG | 1 | 0.700 | 1 | 0.860 |  | 1 | 0.920 | 1 | 0.790 |
|  |  | GT | 0.94 (0.69-1.28) |  | 0.98 (0.74-1.29) |  |  | 0.98 (0.71-1.36) |  | 0.96 (0.73-1.27) |  |
|  | Log-additive | - | 0.99 (0.79-1.23) | 0.920 | 0.85 (0.70-1.04) | 0.110 |  | 0.85 (0.67-1.08) | 0.190 | 0.97 (0.80-1.17) | 0.740 |
| rs3024490 | Allele | A | 1 |  | 1 |  |  | 1 |  | 1 |  |
|  |  | C | 1.15 (0.92-1.44) | 0.216 | 1.24 (1.01-1.52) | **0.041** |  | 1.15 (0.91-1.45) | 0.233 | 1.24 (1.02-1.52) | **0.035** |
|  | Codominant | AA | 1 |  | 1 |  |  | 1 |  | 1 |  |
|  |  | CA | 1.16 (0.84-1.6) | 0.370 | 1.19 (0.88-1.60) | 0.254 |  | 1.35 (0.96-1.91) | 0.081 | 1.06 (0.80-1.42) | 0.688 |
|  |  | CC | 1.6 (0.94-2.71) | 0.084 | 1.61 (1.00-2.60) | **0.048** |  | 1.26 (0.72-2.22) | 0.417 | 1.79 (1.13-2.86) | **0.014** |
|  | Dominant | AA | 1 | 0.190 | 1 | 0.110 |  | 1 | 0.081 | 1 | 0.240 |
|  |  | CA-CC | 1.23 (0.90-1.67) |  | 1.26 (0.95-1.68) |  |  | 1.34 (0.96-1.85) |  | 1.18 (0.90-1.55) |  |
|  | Recessive | AA-CA | 1 | 0.120 | 1 | 0.087 |  | 1 | 0.790 | 1 | **0.012** |
|  |  | CC | 1.48 (0.90-2.45) |  | 1.47 (0.94-2.31) |  |  | 1.07 (0.63-1.83) |  | 1.74 (1.12-2.71) |  |
|  | Overdominant | AA-CC | 1 | 0.710 | 1 | 0.610 |  | 1 | 0.120 | 1 | 0.670 |
|  |  | CA | 1.06 (0.78-1.44) |  | 1.08 (0.81-1.42) |  |  | 1.29 (0.94-1.79) |  | 0.94 (0.72-1.24) |  |
|  | Log-additive | - | 1.23 (0.97-1.55) | 0.087 | 1.24 (1.01-1.54) | **0.044** |  | 1.20 (0.94-1.54) | 0.150 | 1.24 (1.01-1.52) | **0.040** |
| rs1800871 | Allele | A | 1 |  | 1 |  |  | 1 |  | 1 |  |
|  |  | G | 1.17 (0.93-1.46) | 0.171 | 1.24 (1.01-1.52) | **0.042** |  | 1.16 (0.92-1.46) | 0.211 | 1.25 (1.02-1.52) | **0.031** |
|  | Codominant | AA | 1 |  | 1 |  |  | 1 |  | 1 |  |
|  |  | GA | 1.16 (0.84-1.6) | 0.371 | 1.17 (0.86-1.57) | 0.317 |  | 1.34 (0.95-1.89) | 0.091 | 1.05 (0.79-1.40) | 0.736 |
|  |  | GG | 1.68 (0.99-2.84) | 0.055 | 1.63 (1.02-2.62) | **0.043** |  | 1.32 (0.75-2.31) | 0.333 | 1.83 (1.15-2.91) | **0.011** |
|  | Dominant | AA | 1 | 0.170 | 1 | 0.130 |  | 1 | 0.081 | 1 | 0.250 |
|  |  | GA-GG | 1.24 (0.91-1.69) |  | 1.24 (0.94-1.65) |  |  | 1.34 (0.96-1.85) |  | 1.17 (0.89-1.54) |  |
|  | Recessive | AA-GA | 1 | 0.082 | 1 | 0.071 |  | 1 | 0.660 | 1 | **0.009** |
|  |  | GG | 1.56 (0.94-2.57) |  | 1.50 (0.96-2.35) |  |  | 1.13 (0.66-1.91) |  | 1.78 (1.15-2.77) |  |
|  | Overdominant | AA-GG | 1 | 0.760 | 1 | 0.740 |  | 1 | 0.150 | 1 | 0.590 |
|  |  | GA | 1.05 (0.77-1.43) |  | 1.05 (0.79-1.39) |  |  | 1.27 (0.92-1.75) |  | 0.93 (0.71-1.22) |  |
|  | Log-additive | - | 1.25 (0.99-1.57) | 0.064 | 1.24 (1.00-1.53) | **0.047** |  | 1.21 (0.95-1.56) | 0.120 | 1.24 (1.01-1.52) | **0.037** |

OP: osteoporosis; SNP, Single nucleotide polymorphisms; OR, Odds ratio; CI, Confidence interval.

“-” indicates Log-additive model.

‘*p*-value< 0.05’ and bold text represent statistical significance.

**Supplemental table 4** The association analysis between *IL-10* SNPs and susceptibility to OP in the subgroup tests (BMI).

| **SNP ID** | **Model** | **Genotype** | **BMI≥24** | | **BMI<24** | |
| --- | --- | --- | --- | --- | --- | --- |
| **OR (95% CI)** | **P-value** | **OR (95% CI)** | **p-value** |
| rs1554286 | Allele | A | 1 |  | 1 |  |
|  |  | G | 0.95 (0.74-1.22) | 0.696 | 1.16 (0.93-1.46) | 0.186 |
|  | Codominant | AA | 1 |  | 1 |  |
|  |  | AG | 1.09 (0.74-1.58) | 0.674 | 1.07 (0.78-1.48) | 0.671 |
|  |  | GG | 0.87 (0.5-1.49) | 0.605 | 1.47 (0.87-2.47) | 0.150 |
|  | Dominant | AA | 1 | 0.880 | 1 | 0.400 |
|  |  | AG-GG | 1.03 (0.72-1.47) |  | 1.14 (0.84-1.55) |  |
|  | Recessive | AA-AG | 1 | 0.470 | 1 | 0.160 |
|  |  | GG | 0.83 (0.50-1.38) |  | 1.41 (0.86-2.31) |  |
|  | Overdominant | AA-GG | 1 | 0.510 | 1 | 0.930 |
|  |  | AG | 1.12 (0.79-1.60) |  | 0.99 (0.73-1.34) |  |
|  | Log-additive | --- | 0.97 (0.75-1.25) | 0.800 | 1.16 (0.92-1.46) | 0.200 |
| rs1518111 | Allele | T | 1 |  | 1 |  |
|  |  | C | 0.93 (0.73-1.2) | 0.579 | 1.17 (0.93-1.47) | 0.169 |
|  | Codominant | TT | 1 |  | 1 |  |
|  |  | CT | 1.12 (0.77-1.63) | 0.563 | 1.03 (0.74-1.42) | 0.863 |
|  |  | CC | 0.8 (0.46-1.41) | 0.441 | 1.53 (0.91-2.56) | 0.108 |
|  | Dominant | TT | 1 | 0.840 | 1 | 0.490 |
|  |  | CT-CC | 1.04 (0.73-1.48) |  | 1.12 (0.82-1.52) |  |
|  | Recessive | TT-CT | 1 | 0.290 | 1 | 0.093 |
|  |  | CC | 0.76 (0.45-1.28) |  | 1.51 (0.92-2.45) |  |
|  | Overdominant | TT-CC | 1 | 0.360 | 1 | 0.680 |
|  |  | CT | 1.18 (0.83-1.67) |  | 0.94 (0.69-1.27) |  |
|  | Log-additive | --- | 0.95 (0.74-1.23) | 0.710 | 1.16 (0.93-1.46) | 0.190 |
| rs3021094 | Allele | T | 1 |  | 1 |  |
|  |  | G | 1.21 (0.95-1.55) | 0.115 | 0.87 (0.7-1.08) | 0.197 |
|  | Codominant | TT | 1 |  | 1 |  |
|  |  | GT | 1.01 (0.68-1.51) | 0.946 | 0.98 (0.69-1.39) | 0.907 |
|  |  | GG | 1.42 (0.87-2.34) | 0.164 | 0.73 (0.47-1.14) | 0.162 |
|  | Dominant | TT | 1 | 0.540 | 1 | 0.550 |
|  |  | GT-GG | 1.12 (0.78-1.63) |  | 0.90 (0.65-1.26) |  |
|  | Recessive | TT-GT | 1 | 0.130 | 1 | 0.130 |
|  |  | GG | 1.41 (0.91-2.20) |  | 0.74 (0.50-1.09) |  |
|  | Overdominant | TT-GG | 1 | 0.530 | 1 | 0.530 |
|  |  | GT | 0.89 (0.63-1.27) |  | 1.10 (0.81-1.49) |  |
|  | Log-additive | --- | 1.17 (0.91-1.49) | 0.210 | 0.87 (0.70-1.08) | 0.210 |
| rs3024490 | Allele | A | 1 |  | 1 |  |
|  |  | C | 0.93 (0.72-1.19) | 0.540 | 1.15 (0.92-1.44) | 0.221 |
|  | Codominant | AA | 1 |  | 1 |  |
|  |  | CA | 1.12 (0.77-1.62) | 0.572 | 1.03 (0.75-1.42) | 0.857 |
|  |  | CC | 0.78 (0.45-1.37) | 0.388 | 1.48 (0.87-2.5) | 0.147 |
|  | Dominant | AA | 1 | 0.870 | 1 | 0.530 |
|  |  | CA-CC | 1.03 (0.72-1.47) |  | 1.10 (0.81-1.50) |  |
|  | Recessive | AA-CA | 1 | 0.250 | 1 | 0.130 |
|  |  | CC | 0.74 (0.44-1.25) |  | 1.45 (0.88-2.40) |  |
|  | Overdominant | AA-CC | 1 | 0.350 | 1 | 0.740 |
|  |  | CA | 1.18 (0.83-1.68) |  | 0.95 (0.70-1.29) |  |
|  | Log-additive | --- | 0.94 (0.73-1.22) | 0.650 | 1.15 (0.91-1.45) | 0.240 |
| rs1800871 | Allele | A | 1 |  | 1 |  |
|  |  | G | 0.93 (0.72-1.19) | 0.546 | 1.16 (0.92-1.45) | 0.205 |
|  | Codominant | AA | 1 |  | 1 |  |
|  |  | GA | 1.12 (0.77-1.64) | 0.544 | 1.02 (0.73-1.4) | 0.930 |
|  |  | GG | 0.79 (0.45-1.38) | 0.399 | 1.52 (0.9-2.58) | 0.119 |
|  | Dominant | AA | 1 | 0.840 | 1 | 0.550 |
|  |  | GA-GG | 1.04 (0.73-1.48) |  | 1.10 (0.81-1.50) |  |
|  | Recessive | AA-GA | 1 | 0.250 | 1 | 0.096 |
|  |  | GG | 0.74 (0.44-1.25) |  | 1.51 (0.92-2.48) |  |
|  | Overdominant | AA-GG | 1 | 0.330 | 1 | 0.630 |
|  |  | GA | 1.19 (0.84-1.69) |  | 0.93 (0.68-1.26) |  |
|  | Log-additive | --- | 0.95 (0.73-1.22) | 0.670 | 1.15 (0.92-1.45) | 0.220 |

OP: osteoporosis; SNP, Single nucleotide polymorphisms; OR, Odds ratio; CI, Confidence interval.

“-” indicates Log-additive model.

‘*p*-value< 0.05’ and bold text represent statistical significance.

**Supplemental table 5** The FPRP and statistical power values of all the positive results in this study.

| **SNP ID** | **Model** | **Genotype** | **OR (95%CI)** | ***p*** | **S****tatistical Power a (%)** | **Prior probability** | | |
| --- | --- | --- | --- | --- | --- | --- | --- | --- |
| **0.25** | **0.1** | **0.01** |
| **Overall analysis** |  |  |  |  |  |  |  |  |
| rs1554286 | Allele | G | 1.21 (1.04-1.41) | 0.013 | 100.0 | **0.042b** | 0.116 | 0.591 |
|  | Codominant | GG | 1.52 (1.08-2.14) | 0.016 | 94.20 | **0.050 b** | 0.136 | 0.633 |
|  | Dominant | AG-GG | 1.24 (1.01-1.53) | 0.037 | 100.0 | **0.119 b** | 0.287 | 0.816 |
|  | Recessive | GG | 1.39 (1.01-1.92) | 0.042 | 98.6 | **0.122 b** | 0.294 | 0.821 |
|  | Log-additive | - | 1.22 (1.04-1.42) | 0.012 | 100.0 | **0.030 b** | **0.084 b** | 0.504 |
| rs1518111 | Allele | C | 1.22 (1.05-1.42) | 0.011 | 100.0 | **0.030 b** | **0.084 b** | 0.504 |
|  | Codominant | CC | 1.57 (1.11-2.21) | 0.010 | 91.7 | **0.031 b** | **0.087 b** | 0.512 |
|  | Dominant | CT-CC | 1.24 (1.01-1.52) | 0.040 | 100.0 | **0.103 b** | 0.257 | 0.792 |
|  | Recessive | CC | 1.44 (1.04-2.00) | 0.025 | 97.5 | **0.083 b** | 0.215 | 0.750 |
|  | Log-additive | - | 1.22 (1.05-1.43) | 0.010 | 100.0 | **0.041 b** | **0.113 b** | 0.583 |
| rs3024490 | Allele | C | 1.20 (1.03-1.40) | 0.018 | 100.0 | **0.058 b** | **0.155 b** | 0.669 |
|  | Codominant | CC | 1.50 (1.06-2.12) | 0.022 | 94.8 | **0.064 b** | **0.170 b** | 0.693 |
|  | Dominant | CA-CC | 1.23 (1.00-1.51) | 0.046 | 100.0 | **0.126 b** | 0.301 | 0.826 |
|  | Log-additive | - | 1.21 (1.04-1.41) | 0.016 | 100.0 | **0.042 b** | **0.116 b** | 0.591 |
| rs1800871 | Allele | G | 1.21 (1.04-1.41) | 0.014 | 100.0 | **0.042 b** | **0.116 b** | 0.591 |
|  | Codominant | GG | 1.54 (1.09-2.17) | 0.015 | 93.7 | **0.091 b** | 0.232 | 0.768 |
|  | Dominant | GA-GG | 1.23 (1.00-1.51) | 0.047 | 100.0 | **0.126 b** | 0.301 | 0.826 |
|  | Recessive | GG | 1.42 (1.02-1.97) | 0.034 | 98.0 | **0.099 b** | 0.247 | 0.783 |
|  | Log-additive | - | 1.22 (1.04-1.42) | 0.013 | 100.0 | **0.030 b** | **0.084 b** | 0.504 |
| **Female** |  |  |  |  |  |  |  |  |
| rs1554286 | Allele | G | 1.33 (1.08-1.65) | 0.008 | 100.0 | **0.028 b** | **0.079 b** | 0.485 |
|  | Codominant | GG | 2.09 (1.25-3.49) | 0.005 | 43.3 | **0.032 b** | **0.091 b** | 0.525 |
|  | Dominant | AG-GG | 1.37 (1.03-1.83) | 0.030 | 99.5 | **0.091 b** | 0.230 | 0.767 |
|  | Recessive | GG | 1.86 (1.14-3.04) | 0.011 | 61.4 | **0.061 b** | **0.163 b** | 0.682 |
|  | Log-additive | - | 1.37 (1.10-1.70) | 0.005 | 100.0 | **0.013 b** | **0.037 b** | 0.296 |
| rs1518111 | Allele | C | 1.30 (1.05-1.61) | 0.014 | 100.0 | **0.046 b** | **0.127 b** | 0.616 |
|  | Codominant | CC | 2.00 (1.19-3.38) | 0.009 | 50.0 | **0.055 b** | **0.148 b** | 0.656 |
|  | Dominant | CT-CC | 1.34 (1.01-1.78) | 0.045 | 99.7 | **0.115 b** | 0.281 | 0.811 |
|  | Recessive | CC | 1.80 (1.09-2.98) | 0.019 | 65.9 | **0.092 b** | 0.233 | 0.770 |
|  | Log-additive | - | 1.34 (1.07-1.67) | 0.009 | 100.0 | **0.027 b** | **0.076 b** | 0.476 |
| rs3024490 | Allele | C | 1.31 (1.06-1.62) | 0.013 | 100.0 | **0.037 b** | **0.103 b** | 0.557 |
|  | Codominant | CC | 2.13 (1.24-3.65) | 0.006 | 40.9 | **0.042 b** | **0.115 b** | 0.589 |
|  | Dominant | CA-CC | 1.35 (1.01-1.79) | 0.041 | 99.7 | **0.100 b** | 0.251 | 0.786 |
|  | Recessive | CC | 1.91 (1.14-3.21) | 0.012 | 56.9 | **0.071 b** | **0.187 b** | 0.717 |
|  | Log-additive | - | 1.36 (1.09-1.70) | 0.007 | 100.0 | **0.020 b** | **0.059 b** | 0.407 |
| rs1800871 | Allele | G | 1.31 (1.06-1.62) | 0.013 | 100.0 | **0.037 b** | **0.103 b** | 0.557 |
|  | Codominant | GG | 2.13 (1.24-3.64) | 0.006 | 40.9 | **0.040 b** | **0.111 b** | 0.579 |
|  | Dominant | GA-GG | 1.34 (1.01-1.79) | 0.042 | 99.7 | **0.125 b** | 0.301 | 0.825 |
|  | Recessive | GG | 1.91 (1.14-3.21) | 0.012 | 56.9 | **0.071 b** | **0.187 b** | 0.717 |
|  | Log-additive | - | 1.36 (1.09-1.70) | 0.007 | 100.0 | **0.020 b** | **0.059 b** | 0.407 |
| **≤ 60 years old** |  |  |  |  |  |  |  |  |
| rs1554286 | Allele | A | 1.25 (1.02-1.53) | 0.033 | 100.0 | **0.084 b** | 0.215 | 0.751 |
|  | Codominant | GG | 1.89 (1.17-3.06) | 0.010 | 59.1 | **0.047 b** | **0.128 b** | 0.617 |
|  | Recessive | GG | 1.79 (1.13-2.81) | 0.011 | 68.5 | **0.048 b** | **0.130 b** | 0.622 |
|  | Log-additive | - | 1.28 (1.03-1.58) | 0.023 | 100.0 | **0.061 b** | **0.163 b** | 0.681 |
| rs1518111 | Allele | C | 1.26 (1.03-1.55) | 0.024 | 100.0 | **0.027 b** | **0.078 b** | 0.481 |
|  | Codominant | CC | 1.97 (1.21-3.22) | 0.007 | 52.4 | **0.038 b** | **0.105 b** | 0.564 |
|  | Recessive | CC | 1.85 (1.16-2.94) | 0.008 | 62.9 | **0.042 b** | **0.117 b** | 0.593 |
|  | Log-additive | - | 1.30 (1.05-1.61) | 0.017 | 100.0 | **0.046 b** | **0.127 b** | 0.616 |
| rs3024490 | Allele | C | 1.25 (1.02-1.54) | 0.030 | 100.0 | **0.098 b** | 0.245 | 0.781 |
|  | Codominant | CC | 1.92 (1.17-3.15) | 0.009 | 56.4 | **0.050 b** | **0.135 b** | 0.632 |
|  | Recessive | CC | 1.81 (1.13-2.88) | 0.012 | 66.3 | **0.053 b** | **0.143 b** | 0.647 |
|  | Log-additive | - | 1.29 (1.04-1.60) | 0.021 | 100.0 | **0.058 b** | **0.156 b** | 0.670 |
| rs1800871 | Allele | G | 1.27 (1.04-1.56) | 0.022 | 100.0 | **0.064 b** | **0.170 b** | 0.692 |
|  | Codominant | GG | 1.99 (1.22-3.26) | 0.006 | 50.8 | **0.036 b** | **0.100 b** | 0.551 |
|  | Recessive | GG | 1.87 (1.17-2.97) | 0.008 | 61.2 | **0.038 b** | **0.105 b** | 0.564 |
|  | Log-additive | - | 1.31 (1.05-1.62) | 0.015 | 100.0 | **0.037 b** | **0.103 b** | 0.557 |
| **Smoking** |  |  |  |  |  |  |  |  |
| rs1554286 | Allele | G | 1.25 (1.01-1.53) | 0.037 | 100.0 | **0.084 b** | 0.215 | 0.751 |
|  | Codominant | GG | 1.61 (1.01-2.58) | 0.048 | 81.6 | **0.149 b** | 0.345 | 0.853 |
|  | Log-additive | - | 1.25 (1.01-1.54) | 0.041 | 100.0 | **0.098 b** | 0.245 | 0.781 |
| rs1518111 | Allele | C | 1.26 (1.02-1.54) | 0.030 | 100.0 | **0.067 b** | **0.178 b** | 0.704 |
|  | Codominant | CC | 1.67 (1.04-2.68) | 0.033 | 77.3 | **0.115 b** | 0.281 | 0.811 |
|  | Log-additive | - | 1.25 (1.01-1.55) | 0.035 | 100.0 | **0.112 b** | 0.274 | 0.806 |
| rs3024490 | Allele | C | 1.24 (1.01-1.52) | 0.041 | 100.0 | **0.103 b** | 0.257 | 0.792 |
|  | Codominant | CC | 1.61 (1.00-2.60) | 0.048 | 81.2 | **0.160 b** | 0.363 | 0.862 |
|  | Log-additive | - | 1.24 (1.01-1.54) | 0.044 | 100.0 | **0.134 b** | 0.317 | 0.836 |
| rs1800871 | Allele | G | 1.24 (1.01-1.52) | 0.042 | 100.0 | **0.103 b** | 0.257 | 0.792 |
|  | Codominant | GG | 1.63 (1.02-2.62) | 0.043 | 80.1 | **0.140 b** | 0.329 | 0.844 |
|  | Log-additive | - | 1.24 (1.00-1.53) | 0.047 | 100.0 | **0.119 b** | 0.287 | 0.816 |
| **Drinking (Yes)** |  |  |  |  |  |  |  |  |
| rs1554286 | Allele | G | 1.25 (1.03-1.53) | 0.026 | 100.0 | **0.084 b** | 0.215 | 0.751 |
|  | Codominant | GG | 1.79 (1.13-2.82) | 0.012 | 68.4 | **0.050 b** | **0.137 b** | 0.636 |
|  | Recessive | GG | 1.73 (1.12-2.66) | 0.012 | 74.6 | **0.048 b** | **0.131 b** | 0.624 |
|  | Log-additive | - | 1.24 (1.02-1.52) | 0.033 | 100.0 | **0.103 b** | 0.257 | 0.792 |
| rs1518111 | Allele | C | 1.26 (1.03-1.54) | 0.023 | 100.0 | **0.067 b** | **0.178 b** | 0.704 |
|  | Codominant | CC | 1.86 (1.17-2.96) | 0.008 | 62.0 | **0.041 b** | **0.114 b** | 0.585 |
|  | Recessive | CC | 1.81 (1.17-2.81) | 0.007 | 67.2 | **0.035 b** | **0.099 b** | 0.547 |
|  | Log-additive | - | 1.25 (1.02-1.54) | 0.029 | 100.0 | **0.098 b** | 0.245 | 0.781 |
| rs3024490 | Allele | C | 1.24 (1.02-1.52) | 0.035 | 100.0 | **0.103 b** | 0.257 | 0.792 |
|  | Codominant | CC | 1.79 (1.13-2.86) | 0.014 | 67.9 | **0.062 b** | **0.165 b** | 0.685 |
|  | Recessive | CC | 1.74 (1.12-2.71) | 0.012 | 73.1 | **0.055 b** | **0.149 b** | 0.659 |
|  | Log-additive | - | 1.24 (1.01-1.52) | 0.040 | 100.0 | **0.103 b** | 0.257 | 0.792 |
| rs1800871 | Allele | G | 1.25 (1.02-1.52) | 0.031 | 100.0 | **0.071 b** | **0.186 b** | 0.715 |
|  | Codominant | GG | 1.83 (1.15-2.91) | 0.011 | 64.6 | **0.047 b** | **0.129 b** | 0.620 |
|  | Recessive | GG | 1.78 (1.15-2.77) | 0.009 | 69.7 | **0.044 b** | **0.120 b** | 0.601 |
|  | Log-additive | - | 1.24 (1.01-1.52) | 0.037 | 100.0 | **0.103 b** | 0.257 | 0.792 |

FPRP: false-positive report probability.

a Statistical power a was calculated using the number of observations in the subgroup and the OR and p values in this table.

b The level of false-positive report probability threshold was set at 0.2, and ‘b’ and bold text indicate noteworthy findings.

**Supplemental table 6** Difference analysis of clinical indicators of patients under different genotypes of candidate genetic polymorphism

|  | rs1554286 | | | |
| --- | --- | --- | --- | --- |
|  | AA | AG | GG | *p* |
| Platelet count | 257.04 ± 7.33 | 258.98 ± 6.87 | 252.14 ± 13.02 | 0.902 |
| PDW | 12.91 ± 0.25 | 12.64 ± 0.23 | 12.56 ± 0.47 | 0.661 |
| MPV | 8.69 ± 0.08 | 8.61 ± 0.08 | 8.6 ± 0.16 | 0.714 |
| Red blood cell count | 4.29 ± 0.04 | 4.31 ± 0.04 | 4.37 ± 0.06 | 0.574 |
| MCH | 28.2 ± 0.2 | 28.21 ± 0.18 | 27.26 ± 0.38 | 0.059 |
| RDW-CV | 11.39 ± 0.13 | 11.3 ± 0.12 | 11.69 ± 0.26 | 0.349 |
|  | rs1518111 | | | |
|  | TT | CT | CC | *p* |
| Platelet count | 257.12 ± 7.19 | 259.68 ± 6.96 | 249.33 ± 13.22 | 0.793 |
| PDW | 12.91 ± 0.24 | 12.64 ± 0.24 | 12.55 ± 0.45 | 0.665 |
| MPV | 8.69 ± 0.08 | 8.61 ± 0.08 | 8.59 ± 0.15 | 0.748 |
| Red blood cell count | 4.28 ± 0.04 | 4.31 ± 0.04 | 4.37 ± 0.06 | 0.574 |
| MCH | 28.19 ± 0.2 | 28.22 ± 0.18 | 27.28 ± 0.38 | 0.066 |
| RDW-CV | 11.39 ± 0.13 | 11.3 ± 0.12 | 11.69 ± 0.26 | 0.361 |
|  | rs3021094 | | | |
|  | TT | GT | GG | *p* |
| Uric acid | 255.15 ± 6.96 | 254.95 ± 5.42 | 273.03 ± 9.31 | 0.190 |
| Platelet count | 247.12 ± 7.12 | 263.3 ± 7.08 | 260.78 ± 11.54 | 0.291 |
| PDW | 12.52 ± 0.25 | 12.71 ± 0.24 | 13.19 ± 0.38 | 0.324 |
| MPV | 8.56 ± 0.08 | 8.63 ± 0.08 | 8.81 ± 0.13 | 0.240 |
| Red blood cell count | 4.35 ± 0.04 | 4.31 ± 0.04 | 4.23 ± 0.05 | 0.237 |
| MCH | 28.1 ± 0.21 | 28.16 ± 0.19 | 27.93 ± 0.31 | 0.812 |
| MCHC | 331.27 ± 1.18 | 331.76 ± 0.94 | 329.8 ± 1.61 | 0.556 |
| RDW-CV | 11.37 ± 0.14 | 11.35 ± 0.12 | 11.51 ± 0.19 | 0.774 |
|  | rs3024490 | | | |
|  | AA | CA | CC | *p* |
| Platelet count | 257.12 ± 7.19 | 258.79 ± 6.95 | 252.54 ± 13.34 | 0.920 |
| PDW | 12.91 ± 0.24 | 12.64 ± 0.24 | 12.54 ± 0.46 | 0.662 |
| MPV | 8.69 ± 0.08 | 8.61 ± 0.08 | 8.6 ± 0.16 | 0.753 |
| Red blood cell count | 4.28 ± 0.04 | 4.31 ± 0.04 | 4.38 ± 0.06 | 0.521 |
| RDW-CV | 11.39 ± 0.13 | 11.3 ± 0.12 | 11.71 ± 0.27 | 0.309 |
|  | rs1800871 | | | |
|  | AA | GA | GG | *p* |
| Platelet count | 257.84 ± 7.27 | 258.14 ± 6.88 | 252.54 ± 13.34 | 0.933 |
| PDW | 12.91 ± 0.25 | 12.65 ± 0.24 | 12.54 ± 0.46 | 0.671 |
| MPV | 8.69 ± 0.08 | 8.61 ± 0.08 | 8.6 ± 0.16 | 0.787 |
| Red blood cell count | 4.28 ± 0.04 | 4.31 ± 0.04 | 4.38 ± 0.06 | 0.527 |
| RDW-CV | 11.41 ± 0.13 | 11.28 ± 0.12 | 11.71 ± 0.27 | 0.273 |

PDW: platelet distribution width; MPV: mean platelet volume; MCH: mean corpuscular hemoglobin; MCHC: mean corpuscular hemoglobin concentration; RDW-CV: Red blood cell distribution width

**Supplemental table 7** Haplotype analysis of candidate *IL-10* genetic polymorphisms with OP risk.

| **SNP** | **Haplotype** | **Freq (case)** | **Freq (control)** | **Crude analysis** | | **Adjusted by gender, age, BMI** | |
| --- | --- | --- | --- | --- | --- | --- | --- |
| **OR (95%CI)** | ***p*** | **OR (95%CI)** | ***p*** |
| rs1554286|rs1518111|rs3021094|rs3024490|rs1800871 | ATGAA | 0.423 | 0.443 | 1 |  | 1 |  |
| rs1554286|rs1518111|rs3021094|rs3024490|rs1800871 | GCTCG | 0.357 | 0.318 | 1.18 (1.00 - 1.39) | 0.056 | 1.18 (1.00 - 1.39) | 0.053 |
| rs1554286|rs1518111|rs3021094|rs3024490|rs1800871 | ATTAA | 0.204 | 0.231 | 0.92 (0.76 - 1.12) | 0.400 | 0.93 (0.76 - 1.12) | 0.430 |
| rare | ***** | 0.008 | 0.016 | 2.04 (0.94 - 4.41) | 0.070 | 2.05 (0.95 - 4.43) | 0.068 |

OP: osteoporosis; SNP, single nucleotide polymorphism; OR, odds ratio; CI, confidence interval.

‘*****’ represents rare haplotype.
